# Supplementary material for: Stable manganese carbonyl radicals as a rapid colorimetric thiol and hydrazine sensor
Source: Royal Society of Chemistry journal article supplement (doi:10.1039/c4ra16483k), 2015-01-01
Supplement: c4ra16483k1.pdf [file c4ra16483k1.pdf]

**Electronic Supplementary Information**

**Stable manganese carbonyl radicals as a rapid colorimetric thiol and hydrazine sensor**

Hwa Tiong Poh, Tsz Sian Chwee and Wai Yip Fan\*

\*Corresponding author

E-mail: [chmfanwy@nus.edu.sg](mailto:chmfanwy@nus.edu.sg)

Tel: +65-6516-6823

Fax: +65-6779-1691

**Cartesian coordinates for the calculated manganese radical complexes using  
b3lyp/lanl2dz level of theory for structural optimization**

## 1. Determination of Detection Limits

For phenylhydrazine, the equation of the curve obtained is  $y = 1.6132x$  where  $y$  is the absorbance and  $x$  is the concentration in millimolar. A detection limit of 0.05 is chosen because this minimizes contributions from the background as well as any residual absorbance presented from the sensor itself.

Thus, the calculations for determining the limit of detection is done by setting  $y = 0.05$  in the above equation. Therefore,

$$0.05 = 1.6132x$$

Solving for  $x$  yields  $x = 0.03099$  mM.

The molar mass of phenylhydrazine is  $108.14 \text{ g mol}^{-1}$ .

$$\text{Mass of phenylhydrazine in } 1 \text{ dm}^3 = 0.03099 \times 10^{-3} \times 108.14 = 3.35 \times 10^{-3} \text{ g}$$

We define the unit of ppm as 1 mg of solute in 1 liter of solution, therefore the detection limit for phenylhydrazine is thus  $3.35 \text{ ppm} \approx 3.4 \text{ ppm}$ .

The same method is used to calculate the detection limit for 1-octanethiol and *p*-thiocresol.

## 2. Stability Data for Complex 1 and 2

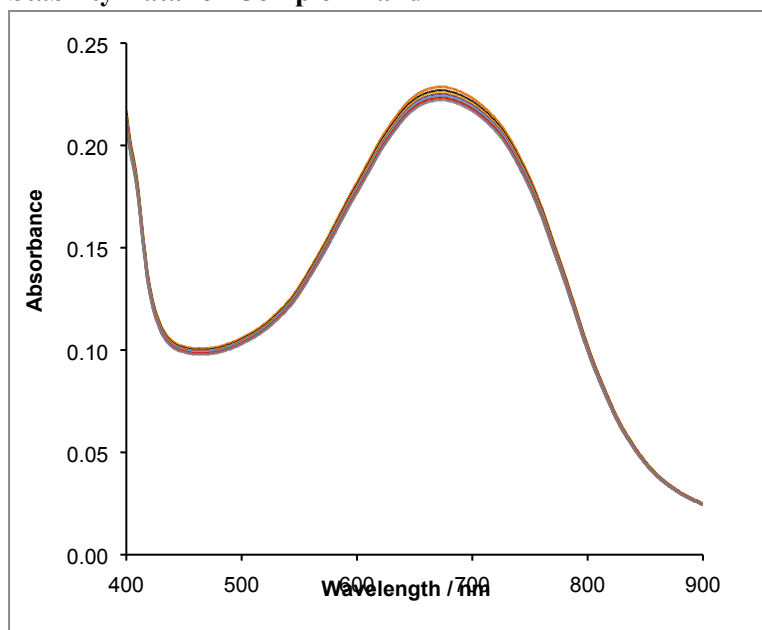

**Figure S1.** Changes in the UV-vis absorptions band of 0.10mM **1** over a period of 7 days. There were no changes in the colour of the complex even though small amounts of a dark brown solid was observed at the bottom of the vial.

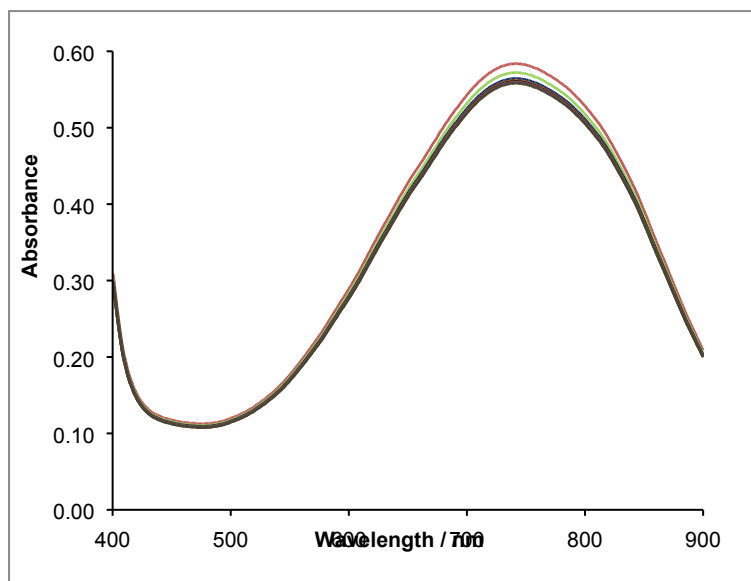

**Figure S2.** Changes in the UV-vis absorptions band of 0.10mM of **2** over a period of 7 days. There were no changes in the colour of the complex even though small amounts of a light brown solid was observed at the bottom of the vial.

**CpMn(CO)<sub>2</sub>(NHPH)**

| Center<br>Number | Atomic<br>Number | Atomic<br>Type | Coordinates (Angstroms) |           |           |
|------------------|------------------|----------------|-------------------------|-----------|-----------|
|                  |                  |                | X                       | Y         | Z         |
| 1                | 25               | 0              | 1.161078                | -0.133707 | 0.034589  |
| 2                | 6                | 0              | 1.708236                | 1.261370  | -1.625771 |
| 3                | 6                | 0              | 0.564757                | 1.815555  | -0.954948 |
| 4                | 6                | 0              | 2.799769                | 1.242236  | -0.676642 |
| 5                | 1                | 0              | 1.757384                | 0.977466  | -2.667153 |
| 6                | 6                | 0              | 0.925866                | 2.099418  | 0.399130  |
| 7                | 1                | 0              | -0.416878               | 1.950190  | -1.387218 |
| 8                | 6                | 0              | 2.312472                | 1.745242  | 0.568722  |
| 9                | 1                | 0              | 3.808977                | 0.908193  | -0.875122 |
| 10               | 1                | 0              | 0.300715                | 2.559504  | 1.150261  |
| 11               | 1                | 0              | 2.893812                | 1.867065  | 1.472438  |
| 12               | 6                | 0              | 1.211155                | -0.830075 | 1.718219  |
| 13               | 8                | 0              | 1.178544                | -1.291763 | 2.801210  |
| 14               | 6                | 0              | 2.053104                | -1.537374 | -0.642754 |
| 15               | 8                | 0              | 2.704316                | -2.412897 | -1.100836 |
| 16               | 7                | 0              | -0.522209               | -0.952504 | -0.250116 |
| 17               | 1                | 0              | -0.488776               | -1.906826 | -0.610092 |
| 18               | 6                | 0              | -1.844365               | -0.495504 | -0.153065 |
| 19               | 6                | 0              | -2.188655               | 0.662115  | 0.595062  |
| 20               | 6                | 0              | -2.894931               | -1.212079 | -0.800718 |
| 21               | 6                | 0              | -3.522116               | 1.099031  | 0.667122  |
| 22               | 1                | 0              | -1.413613               | 1.180722  | 1.146999  |
| 23               | 6                | 0              | -4.222845               | -0.770950 | -0.718017 |
| 24               | 1                | 0              | -2.651556               | -2.108230 | -1.369294 |
| 25               | 6                | 0              | -4.549011               | 0.393462  | 0.010459  |

|    |   |   |           |           |           |
|----|---|---|-----------|-----------|-----------|
| 26 | 1 | 0 | -3.759718 | 1.987059  | 1.249232  |
| 27 | 1 | 0 | -5.005940 | -1.335002 | -1.220072 |
| 28 | 1 | 0 | -5.579395 | 0.732644  | 0.072306  |

**CpMn(CO)<sub>2</sub>(SCH<sub>3</sub>)**

| Center<br>Number | Atomic<br>Number | Atomic<br>Type | Coordinates (Angstroms) |           |           |
|------------------|------------------|----------------|-------------------------|-----------|-----------|
|                  |                  |                | X                       | Y         | Z         |
| -----            |                  |                |                         |           |           |
| 1                | 25               | 0              | 0.223308                | -0.101583 | -0.003252 |
| 2                | 6                | 0              | 1.963010                | 0.603090  | -1.201333 |
| 3                | 6                | 0              | 1.746136                | 1.516127  | -0.114326 |
| 4                | 6                | 0              | 2.298112                | -0.683722 | -0.635801 |
| 5                | 1                | 0              | 1.912590                | 0.843665  | -2.253800 |
| 6                | 6                | 0              | 1.932936                | 0.802481  | 1.118429  |
| 7                | 1                | 0              | 1.473704                | 2.557919  | -0.207355 |
| 8                | 6                | 0              | 2.282059                | -0.558345 | 0.790070  |
| 9                | 1                | 0              | 2.531069                | -1.581942 | -1.191045 |
| 10               | 1                | 0              | 1.852051                | 1.217967  | 2.112883  |
| 11               | 1                | 0              | 2.492126                | -1.348740 | 1.497851  |
| 12               | 6                | 0              | -0.600275               | -1.062730 | 1.289322  |
| 13               | 8                | 0              | -1.152349               | -1.661665 | 2.143113  |
| 14               | 6                | 0              | -0.616108               | -1.077771 | -1.272529 |
| 15               | 8                | 0              | -1.183098               | -1.689364 | -2.107593 |
| 16               | 16               | 0              | -1.385717               | 1.513385  | 0.002236  |
| 17               | 6                | 0              | -3.113808               | 0.734548  | -0.004164 |
| 18               | 1                | 0              | -3.234342               | 0.071657  | 0.856692  |
| 19               | 1                | 0              | -3.835184               | 1.553068  | 0.059714  |
| 20               | 1                | 0              | -3.272041               | 0.178000  | -0.931575 |

**CpMn(CO)<sub>2</sub>(SPh)**

| Center<br>Number | Atomic<br>Number | Atomic<br>Type | Coordinates (Angstroms) |           |           |
|------------------|------------------|----------------|-------------------------|-----------|-----------|
|                  |                  |                | X                       | Y         | Z         |
| 1                | 25               | 0              | -1.268849               | 0.007872  | 0.109256  |
| 2                | 6                | 0              | -3.016086               | 1.159356  | -0.649503 |
| 3                | 6                | 0              | -2.777633               | 0.043696  | -1.521671 |
| 4                | 6                | 0              | -3.358737               | 0.635092  | 0.652590  |
| 5                | 1                | 0              | -2.974585               | 2.203559  | -0.925341 |
| 6                | 6                | 0              | -2.961136               | -1.165618 | -0.767320 |
| 7                | 1                | 0              | -2.500815               | 0.103131  | -2.564814 |
| 8                | 6                | 0              | -3.328312               | -0.794413 | 0.576541  |
| 9                | 1                | 0              | -3.608277               | 1.217671  | 1.528860  |
| 10               | 1                | 0              | -2.865329               | -2.172711 | -1.147889 |
| 11               | 1                | 0              | -3.540079               | -1.477213 | 1.388263  |
| 12               | 6                | 0              | -0.460742               | -1.224654 | 1.169496  |
| 13               | 8                | 0              | 0.045802                | -2.045211 | 1.845947  |
| 14               | 6                | 0              | -0.481206               | 1.336909  | 1.060526  |
| 15               | 8                | 0              | 0.011683                | 2.219031  | 1.666189  |
| 16               | 16               | 0              | 0.349866                | -0.068556 | -1.509368 |
| 17               | 6                | 0              | 2.035780                | -0.033017 | -0.746298 |
| 18               | 6                | 0              | 2.701696                | -1.240297 | -0.450743 |
| 19               | 6                | 0              | 2.683726                | 1.198654  | -0.519087 |
| 20               | 6                | 0              | 4.006392                | -1.213353 | 0.078576  |
| 21               | 1                | 0              | 2.208412                | -2.190560 | -0.637273 |
| 22               | 6                | 0              | 3.988649                | 1.220767  | 0.009860  |
| 23               | 1                | 0              | 2.177117                | 2.129613  | -0.759375 |
| 24               | 6                | 0              | 4.653052                | 0.016046  | 0.311625  |
| 25               | 1                | 0              | 4.512611                | -2.148509 | 0.306742  |

|    |   |   |          |          |          |
|----|---|---|----------|----------|----------|
| 26 | 1 | 0 | 4.481265 | 2.174628 | 0.183937 |
| 27 | 1 | 0 | 5.660522 | 0.034920 | 0.720742 |

**CpMn(CO)<sub>2</sub>(NHNH<sub>2</sub>)**

| Center<br>Number | Atomic<br>Number | Atomic<br>Type | Coordinates (Angstroms) |           |           |
|------------------|------------------|----------------|-------------------------|-----------|-----------|
|                  |                  |                | X                       | Y         | Z         |
| 1                | 25               | 0              | -0.021584               | 0.001679  | -0.000727 |
| 2                | 6                | 0              | -1.829440               | -0.873447 | 1.048149  |
| 3                | 6                | 0              | -1.829779               | 0.551309  | 1.248185  |
| 4                | 6                | 0              | -1.948894               | -1.121206 | -0.359993 |
| 5                | 1                | 0              | -1.768620               | -1.628827 | 1.819661  |
| 6                | 6                | 0              | -1.946865               | 1.180237  | -0.034710 |
| 7                | 1                | 0              | -1.764122               | 1.063727  | 2.198331  |
| 8                | 6                | 0              | -2.008162               | 0.146956  | -1.037896 |
| 9                | 1                | 0              | -1.987702               | -2.094203 | -0.830905 |
| 10               | 1                | 0              | -1.987810               | 2.245383  | -0.217989 |
| 11               | 1                | 0              | -2.127065               | 0.296980  | -2.101763 |
| 12               | 6                | 0              | 0.889369                | 1.357576  | -0.743326 |
| 13               | 8                | 0              | 1.477403                | 2.265437  | -1.222587 |
| 14               | 6                | 0              | 0.904381                | -1.182179 | -0.982001 |
| 15               | 8                | 0              | 1.509190                | -1.977268 | -1.615534 |
| 16               | 7                | 0              | 1.116093                | -0.142371 | 1.475873  |
| 17               | 1                | 0              | 0.670591                | -0.261845 | 2.388959  |
| 18               | 6                | 0              | 2.580508                | -0.147330 | 1.580976  |
| 19               | 1                | 0              | 2.942395                | 0.643421  | 2.259204  |
| 20               | 1                | 0              | 2.960431                | -1.110224 | 1.962714  |
| 21               | 1                | 0              | 3.029416                | 0.023367  | 0.597519  |
